# Supplementary material for: lncRNA transcriptional initiation induces chromatin remodeling within a limited range in the fission yeast fbp1 promoter
Source: PubMed Central journal article supplement (PMC6342983; doi:10.1038/s41598-018-36049-0), 2019-01-22
Supplement: 41598_2018_36049_MOESM1_ESM.pdf [file 41598_2018_36049_MOESM1_ESM.pdf]

**lncRNA transcriptional initiation induces chromatin remodeling within a limited range in the fission yeast *fbp1* promoter**

Satoshi Senmatsu<sup>1\*</sup>, Ryuta Asada<sup>1\*</sup>, Takuya Abe<sup>1</sup>, Charles S. Hoffman<sup>2</sup>, Kunihiro Ohta<sup>3,4</sup> and Kouji Hirota<sup>1,†</sup>

<sup>1</sup>Department of Chemistry, Graduate School of Science, Tokyo Metropolitan University, Minamiosawa 1-1, Hachioji-shi, Tokyo, 192-0397, Japan

<sup>2</sup>Biology Department, Boston College, Chestnut Hill, MA 02467, USA.

<sup>3</sup>Department of Life Sciences, The University of Tokyo, Meguro-ku, Tokyo 153-8902, Japan

<sup>4</sup>Universal Biology Institute, The University of Tokyo, Bunkyo-ku, Tokyo 113-0033, Japan

\*These authors equally contributed to this work.

†Correspondence: Kouji Hirota Ph.D. ([khirota@tmu.ac.jp](mailto:khirota@tmu.ac.jp))

Department of Chemistry, Graduate School of Science, Tokyo Metropolitan University, Minamiosawa 1-1, Hachioji-shi, Tokyo, 192-0397, Japan Tel:+81-42-677-2542, Fax: +81-42-677-2542

Supplementary Information: Table S1-S2, and Figure S1-S5

**Supplementary Table S1 Fission yeast strains used in this study**

---

| Strain | Genotype                                                                                                     |
|--------|--------------------------------------------------------------------------------------------------------------|
| SPH2   | <i>h<sup>+</sup> ura4-D18</i>                                                                                |
| SPH20  | <i>h<sup>-</sup> ade6-M26 rst2-3flag&lt;&lt;kanMX6 leu1-32</i>                                               |
| SPH280 | <i>h<sup>+</sup> ura4-D18 mlon-c promoter(-871 to -862)::act1(+436 to +445)</i>                              |
| SPH281 | <i>h<sup>+</sup> ura4-D18 mlon-c promoter(-861 to -852)::act1(+446 to +455)</i>                              |
| SPH282 | <i>h<sup>+</sup> ura4-D18 mlon-c promoter(-851 to -842)::act1(+456 to +465)</i>                              |
| SPH283 | <i>h<sup>+</sup> ura4-D18 mlon-c promoter(-841 to -827)::act1(+466 to +480)</i>                              |
| SPH323 | <i>h<sup>+</sup> ura4-D18 mlon-c promoter(-826 to -817)::act1(+456 to +465)</i>                              |
| SPH324 | <i>h<sup>+</sup> ura4-D18 mlon-c promoter(-816 to -807)::act1(+456 to +465)</i>                              |
| SPH350 | <i>h<sup>+</sup> ura4-D18 mlon-c promoter(-806 to -797)::act1(+456 to +465)</i>                              |
| SPH351 | <i>h<sup>+</sup> ura4-D18 mlon-c promoter(-796 to -787)::act1(+456 to +465)</i>                              |
| SPH352 | <i>h<sup>+</sup> ura4-D18 mlon-c promoter(-786 to -777)::act1(+456 to +465)</i>                              |
| SPH353 | <i>h<sup>+</sup> ura4-D18 mlon-c promoter(-776 to -767)::act1(+456 to +465)</i>                              |
| SPH354 | <i>h<sup>+</sup> ura4-D18 mlon-c promoter(-766 to -757)::act1(+456 to +465)</i>                              |
| SPH355 | <i>h<sup>+</sup> ura4-D18 mlon-c promoter(-756 to -747)::act1(+456 to +465)</i>                              |
| SPH356 | <i>h<sup>+</sup> ura4-D18 mlon-c promoter((-746 to -737)::act1(+456 to +465)</i>                             |
| SPH357 | <i>h<sup>+</sup> ura4-D18 mlon-c promoter(-736 to -727)::act1(+456 to +465)</i>                              |
| SPH406 | <i>h<sup>+</sup> ura4-D18 mlon-c promoter(-937 to -619)Δ</i>                                                 |
| SPH420 | <i>h<sup>+</sup> ura4-D18 mlon-c promoter(-851 to -842)::act1(+456 to +465)<br/>rst2-3flag&lt;&lt;kanMX6</i> |
| SPH421 | <i>h<sup>+</sup> ura4-D18 mlon-c promoter(-937 to -619)Δ rst2-3flag&lt;&lt;kanMX6</i>                        |
| SPH436 | <i>h<sup>+</sup> ura4-D18 mlon-c promoter(-937 to -669)Δ</i>                                                 |
| SPH437 | <i>h<sup>+</sup> ura4-D18 mlon-c promoter(-937 to -719)Δ</i>                                                 |
| SPH438 | <i>h<sup>+</sup> ura4-D18 mlon-c promoter(-937 to -769)Δ</i>                                                 |
| SPH439 | <i>h<sup>+</sup> ura4-D18 mlon-c promoter(-937 to -819)Δ</i>                                                 |

---

**Supplementary Table S2 Primers used in this study**

| Primer | Sequence                              |
|--------|---------------------------------------|
| p1     | CATTGACTCCGATATCTCGG                  |
| p2     | GCACCATACATAGTATAGCC                  |
| p3     | TGGTACGACCTTGATGTCTAGCAATTGTGTATG     |
| p4     | ACGATACCAGTGCCTATGATTTGATGTCTAGC      |
| p5     | AGAGTCCAAGCGACCCCAATTGCCTATG          |
| p6     | GGTAACACCATCACCTACATAAGATCGACCCCAATTG |
| p7     | AGAGTCCAAGCATAACCCACAGCAATTACATAAG    |
| p8     | AGAGTCCAAGACCTCAATTGCATACCCAC         |
| p9     | AGAGTCCAAGTTCATCACCGACCTCAATTG        |
| p10    | AGAGTCCAAGGACCGCTGCTTTCATCAC          |
| p11    | AGAGTCCAAGAGGCGAGCATGACCGCTG          |
| p12    | AGAGTCCAAGAAGGATTGAGAGGCGAG           |
| p13    | AGAGTCCAAGTACATTCGTAAAGGATTGAGAGG     |
| p14    | AGAGTCCAAGACTCCCTTAATACATTCGTAAAG     |
| p15    | AGAGTCCAAGATGGCATGGCACTCCCTTAATAC     |
| p16    | AGAGTCCAAGATGGCATGGCATGGCATG          |
| p17    | GGTCGTACCAATTGGGGTTCGATCTTATGTAATTG   |
| p18    | CTGGTATCGTATCTTATGTAATTGCTGTGGG       |
| p19    | CTTGGACTCTATTGCTGTGGGTATGCAATTG       |
| p20    | GGTGATGGTGTACCCAATTGAGGTTCGGTGATG     |
| p21    | CTTGGACTCTCGGTGATGAAAGCAGCGG          |
| p22    | CTTGGACTCTAGCAGCGGTCATGCTCG           |
| p23    | CTTGGACTCTATGCTCGCCTCTCAATCC          |
| p24    | CTTGGACTCTCTCAATCCTTTACGAATGTATTAAG   |
| p25    | CTTGGACTCTTACGAATGTATTAAGGGAGTGC      |
| p26    | CTTGGACTCTTTAAGGGAGTGCCATGC           |
| p27    | CTTGGACTCTGCCATGCCATGCCATGC           |
| p28    | CTTGGACTCTGCCATGCCATTTTCTCAGTC        |
| p29    | CTTGGACTCTTTTCTCAGTCACGTAAACCTC       |

p30 CTTGGACTCTACGTAAACCTCGATACGATAC  
p31 AACTTGAACCTTGTTTTCTCGTGC  
p32 GTTTGGTAAGCCGGCTTC  
p33 CAGTATTATAGGAAAGATGAATAGGGTG  
p34 CCTCGATACGATACAAGCTCTAAC  
p35 GTATTAAGGGAGTGCCATGCC  
P36 GGTCGGTGATGAAAGCAGC  
p37 CGCCGATACAATCAGAAGC  
p38 CGATGAGTTTGCAGCATCC  
p39 CTACCCGTAACCTTACAG  
p40 TGGAAGAAATGACACGAG  
P41 GCAGGCTGAAACAGCATTG  
P42 GTTCCGCGAATCATAAGCC  
P43 GCACAGTCGTTGTACAAATTCGTATTCCC  
P44 ACGATTCTAAACGCCTCTTGTTACGATC

---

**Supplementary Figure S1**

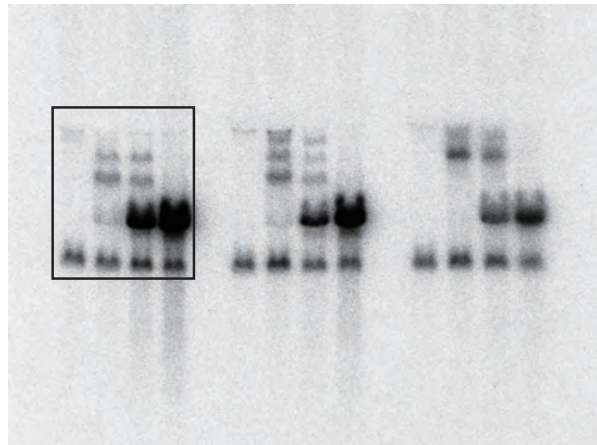

Uncropped blot used in Figure 1A

**Supplementary Figure S2**

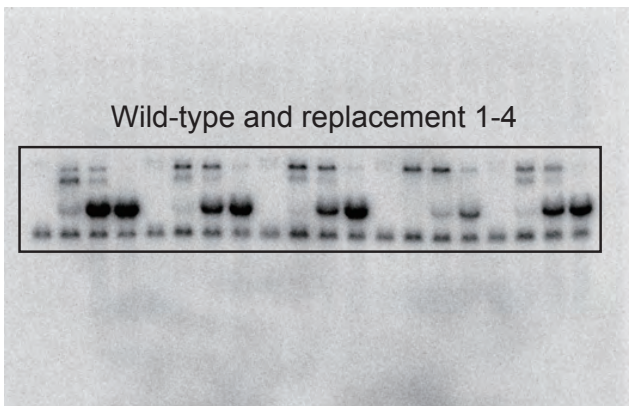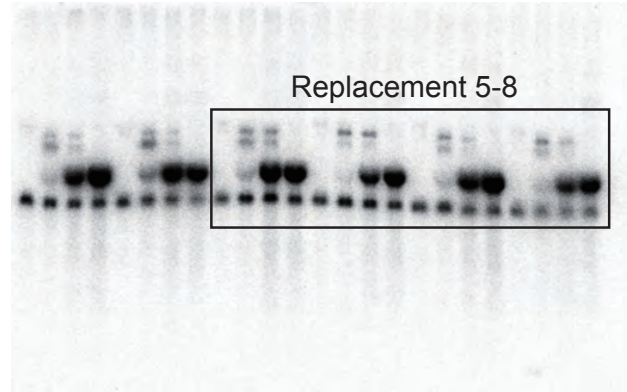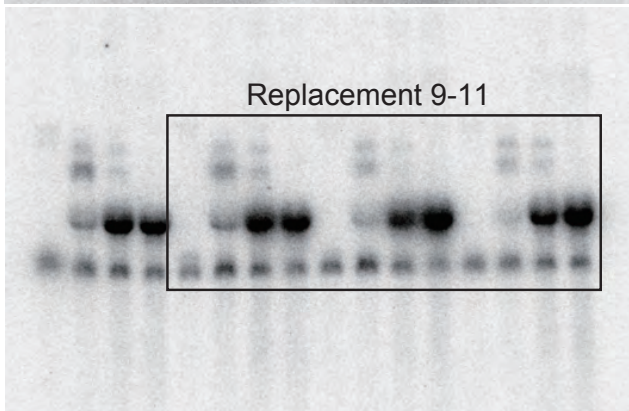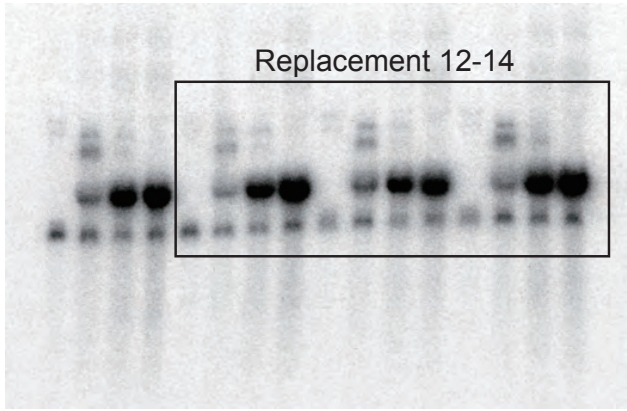

Uncropped blot used in Figure 1C

**Supplementary Figure S3**

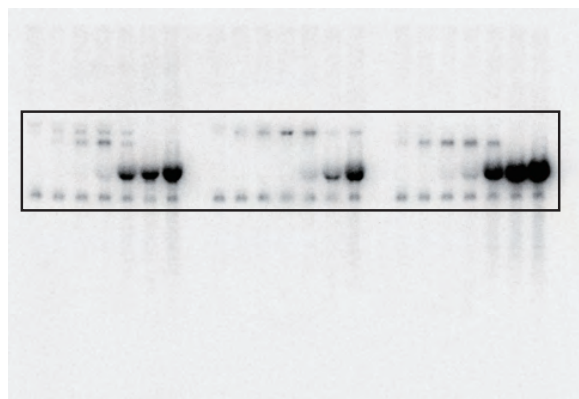

Uncropped blot used in Figure 2

Supplementary Figure S4

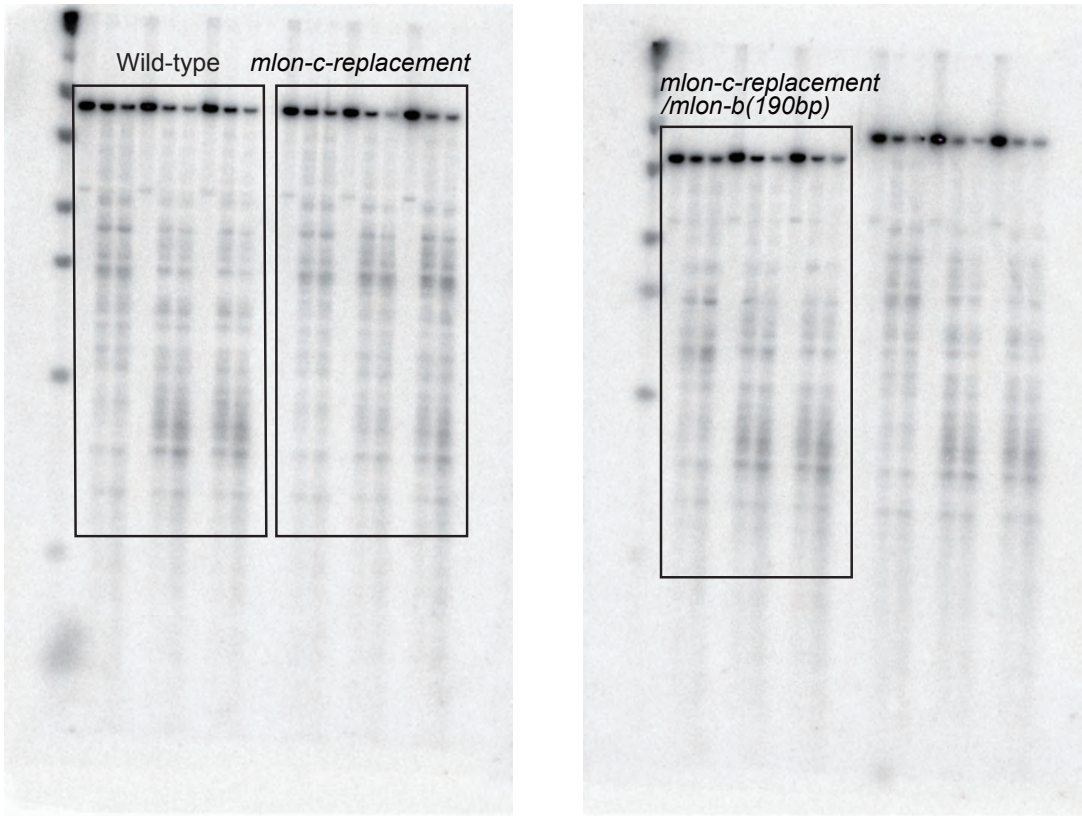

Uncropped blot used in Figure 3A

## Supplementary Figure S5

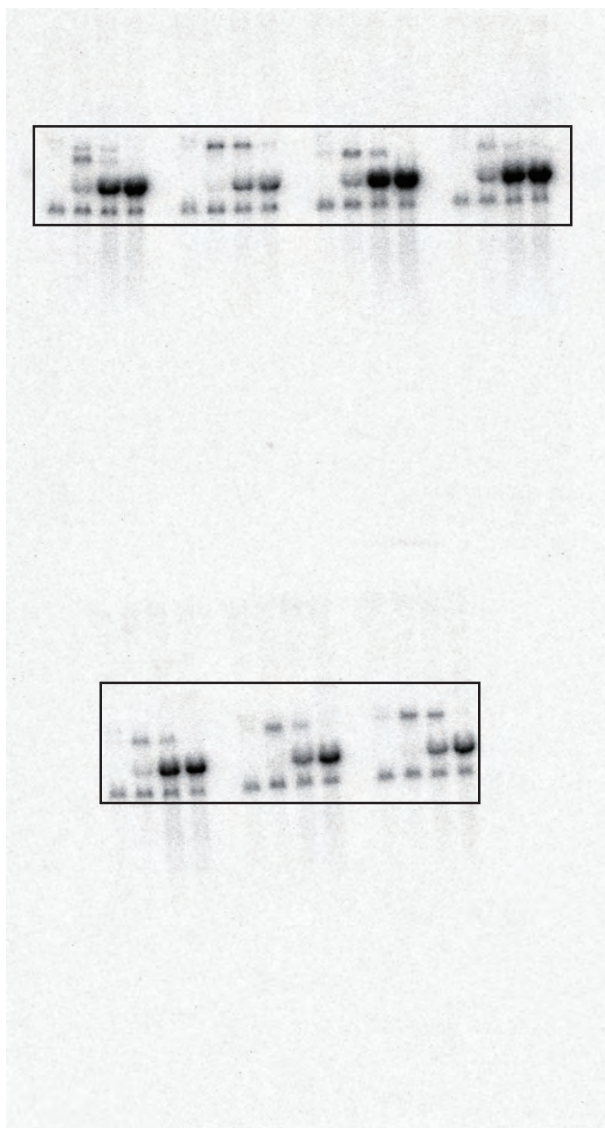

Uncropped blot used in Figure 4
